# Supplementary material for: P53/miR-34a/SIRT1 positive feedback loop regulates the termination of liver regeneration
Source: publisher site journal article supplement (doi:10.18632/aging.203920), 2023-03-28
Supplement: Supplementary file [file aging-v15i6-203920-supplementary-material-SD1.pdf]

## SUPPLEMENTARY FIGURES

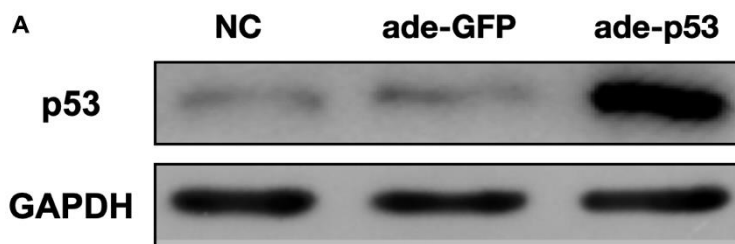

**Supplementary Figure 1. Transfection efficiency of adenovirus *in vivo*.** Mice were transfected with either Ade-GFP (as the control) or Ade-P53 by tail vein injection five days before the surgeries. Expression of p53 in the liver tissues analyzed by WB.

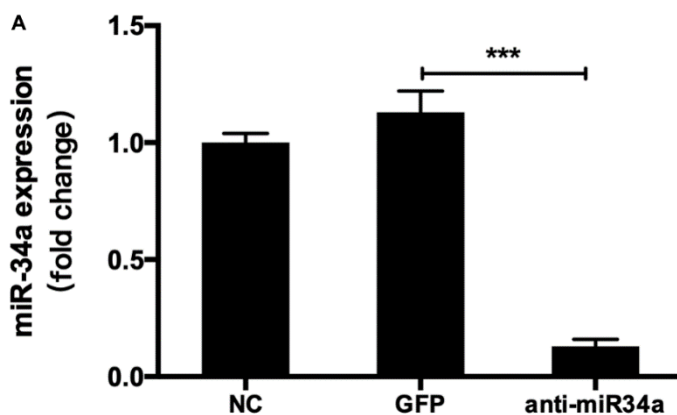

**Supplementary Figure 2. Transfection efficiency of AAV8 *in vivo*.** Mice were transfected with either AAV8-GFP (as the control) or AAV8-anti-miR-34a by tail vein injection two weeks before the surgeries. Expression of miR-34a in the liver tissues analyzed by qPCR. (values are means  $\pm$ SD, \*\*\* $P < 0.05$ ).

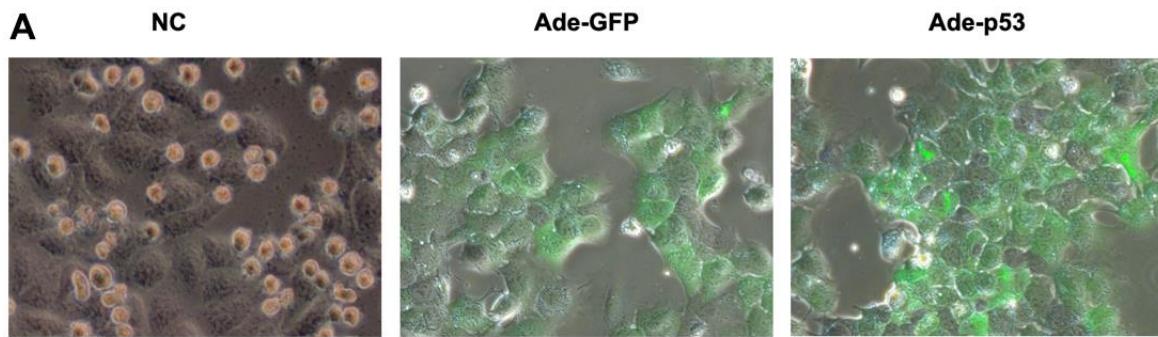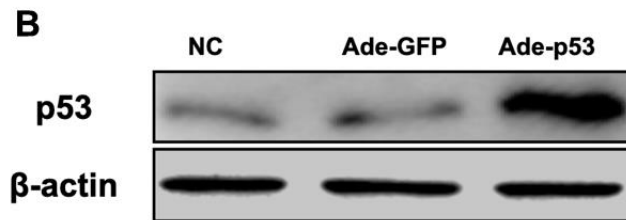

**Supplementary Figure 3. Transfection efficiency of hepatocytes *in vitro*.** Transfection efficiency of hepatocytes *in vitro*. Primary hepatocytes were transfected by adenovirus according to the manufacturer's instructions, and cells transfected with GFP were used as control. (A) Hepatocytes were observed under light and fluorescence microscope after transfection. (B) Expression of P53 in the hepatocytes analyzed by western blot.
