# Supplementary material for: P53/miR-34a/SIRT1 positive feedback loop regulates the termination of liver regeneration
Source: publisher site journal article supplement (doi:10.18632/aging.203920), 2023-03-28
Supplement: Supplementary file [file aging-v15i6-203920-supplementary-material-SD2.pdf]

## SUPPLEMENTARY TABLES

**Supplementary Table 1. List of BAs assessed by UHPLC.**

|                  |                             |
|------------------|-----------------------------|
| T- $\alpha$ -MCA | Tauro-alpha-Muricholic acid |
| T- $\beta$ -MCA  | Tauro-beta-Muricholic acid  |
| THCA             | Taurohyocholic acid         |
| TUDCA            | Tauroursodeoxycholic acid   |
| TCA              | Taurocholic acid            |
| GCA              | Glycocholic acid            |
| $\omega$ -MCA    | Omega-Muricholic acid       |
| $\alpha$ -MCA    | Alpha-Muricholic acid       |
| $\beta$ -MCA     | Beta-Muricholic acid        |
| HCA              | Hyocholic acid              |
| TDCA             | Taurodeoxycholic acid       |
| CA               | Cholic acid                 |
| UDCA             | Ursodeoxycholic acid        |
| HDCA             | Hyodeoxycholic acid         |
| nutriCA          | Nutri cholic acid           |
| 12-ketoDCA       | 12-keto deoxycholic acid    |
| TLCA             | Taurolithocholic acid       |
| CDCA             | Chenodeoxycholic acid       |
| DCA              | Deoxycholic acid            |
| GLCA             | Glycolithocholic acid       |
| iso-DCA          | Iso-lithocholic acid        |
| LCA              | Lithocholic acid            |

**Supplementary Table 2. List of primary antibody and concentration used in WB.**

| Target protein   | Catalog number | Company     | Concentration |
|------------------|----------------|-------------|---------------|
| P53              | Ab26           | Abcam, Inc. | 1:1000        |
| Ace-P53          | 2570S          | CST         | 1:1000        |
| SIRT1            | 8469S          | CST         | 1:1000        |
| cleaved Caspase3 | Ab231289       | Abcam, Inc. | 1:1000        |
| P21              | Ab188224       | Abcam, Inc. | 1:1000        |
| Bax              | Ab32503        | Abcam, Inc. | 1:1000        |
| NR1H4 (FXR)      | Ab187735       | Abcam, Inc. | 1:1000        |
| NR0B2 (SHP)      | Ab186874       | Abcam, Inc. | 1:1000        |
